# Supplementary material for: Unusual Gd–nitronyl nitroxide antiferromagnetic coupling and slow magnetic relaxation in the corresponding Tb analogue
Source: Royal Society of Chemistry journal article supplement (doi:10.1039/c5dt01487e), 2015-01-01
Supplement: c5dt01487e1.pdf [file c5dt01487e1.pdf]

## Supporting Information

### Unusual Gd-nitronyl nitroxide antiferromagnetic coupling and slow magnetic relaxation in the corresponding Tb analogue

Xiufeng Wang,<sup>a</sup> Mei Zhu,<sup>a</sup> Juanjuan Wang,<sup>a</sup> Licun Li\*<sup>a</sup>

*Department of Chemistry, Key Laboratory of Advanced Energy Materials Chemistry and Tianjin Key Laboratory of Metal and Molecule-based Material Chemistry, Nankai University, Tianjin 300071, China*

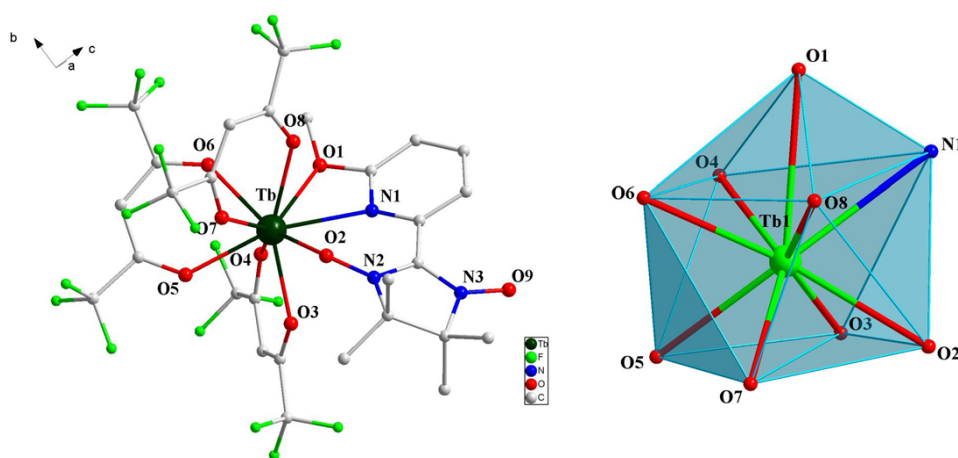

**Figure S1.** Crystal structure of complex **2** (left: All hydrogen atoms are omitted for clarity) and coordination polyhedron of Tb ion in complex **2** (right).

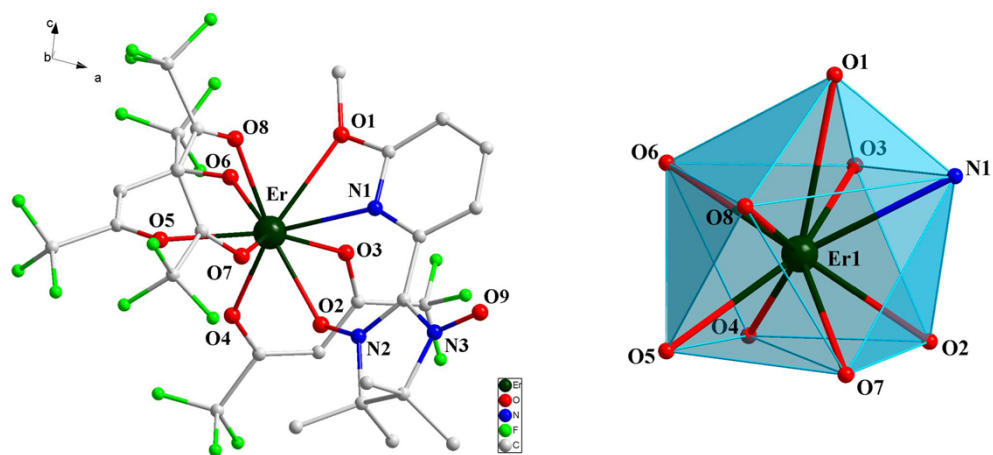

**Figure S2.** Crystal structure of complex **3** (left: All hydrogen atoms are omitted for clarity) and coordination polyhedron of Er ion in complex **3** (right).

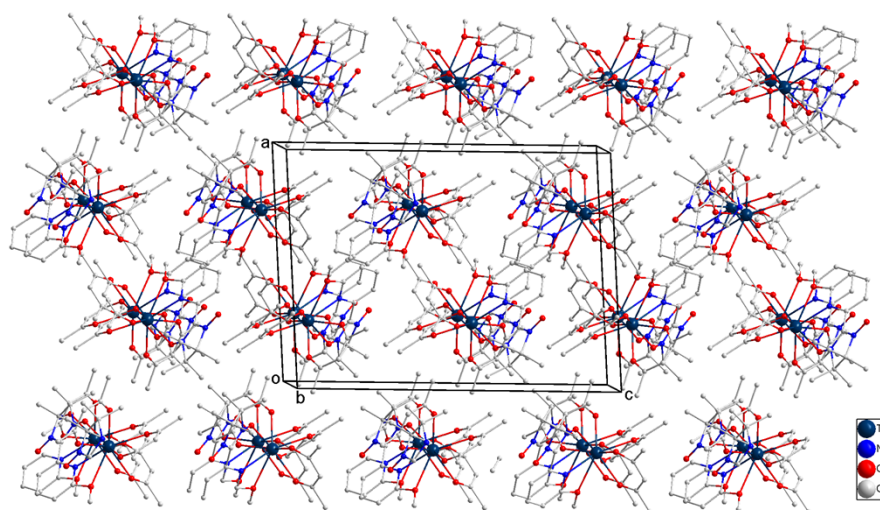

**Figure S3.** Packing diagram of complex **2**. All hydrogen and fluorine atoms are not shown for the sake of clarity.

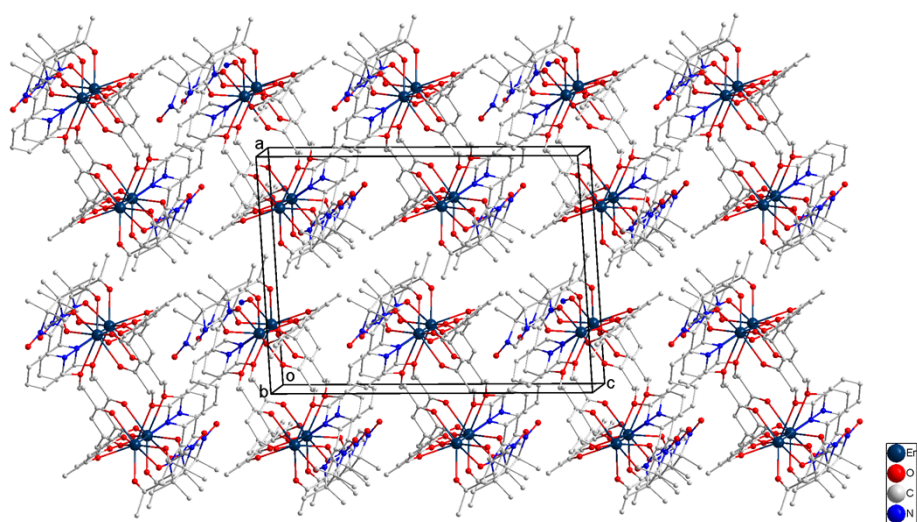

**Figure S4.** Packing diagram of complex 3. All hydrogen and fluorine atoms are not shown for the sake of clarity.

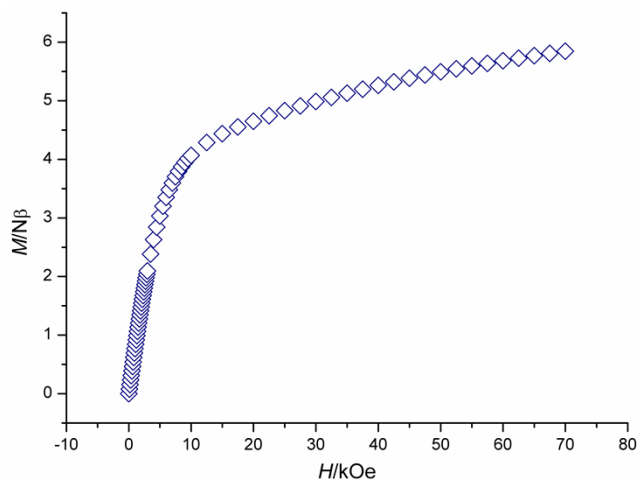

**Figure S5.**  $M$  vs  $H$  plot for complex 2.

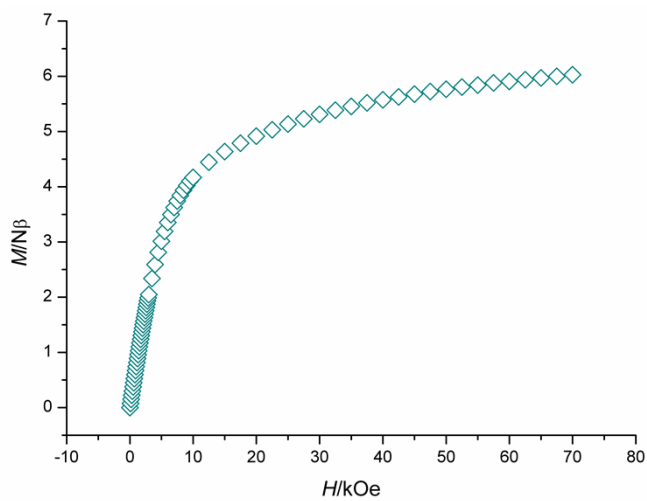

**Figure S6.**  $M$  vs  $H$  plot for complex 3.

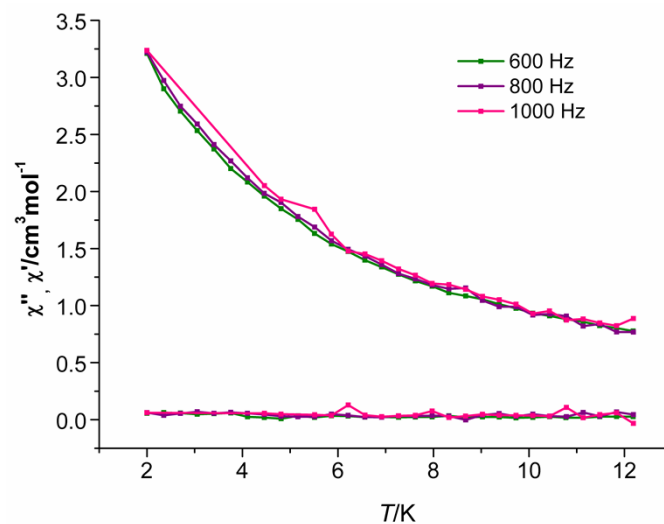

**Figure S7.** Temperature-dependent ac magnetic susceptibility of **3** with an oscillation of 2.5 Oe in 2000 Oe dc field.

**Table S1** SHAPE analysis for similar complexes in literature.

| complex                          | SAPR-8       | TDD-8 | JBTPR-8 | BTPR-8 |
|----------------------------------|--------------|-------|---------|--------|
| [Gd(hfac) <sub>3</sub> (NIToPy)] | <b>1.003</b> | 1.407 | 1.621   | 1.534  |
| [Tb(hfac) <sub>3</sub> (NIToPy)] | <b>0.782</b> | 1.749 | 1.581   | 1.468  |
